# Supplementary material
Source: Springer Nature journal article supplement (https://www.springermedizin.de/resource/supplementary/12881_2006_204_MOESM4_ESM.pdf/9452628)
Supplement: MOESM4 [file 9452628]

| Supplementary Table 4: Genotyping and statistical results for microsatellite |                |               |                                 |                               |         |        |                                  |                                |         |        |
|------------------------------------------------------------------------------|----------------|---------------|---------------------------------|-------------------------------|---------|--------|----------------------------------|--------------------------------|---------|--------|
|                                                                              | Polymorphism   | variable      | At least one [CA] <sub>14</sub> | Absence of [CA] <sub>14</sub> | p-value | Test   | At least one [CA] <sub>≥21</sub> | Absence of [CA] <sub>≥21</sub> | p-value | Test   |
| <b>Stage at Diagnosis</b>                                                    | microsatellite | 0             | 42 (74%)                        | 15 (26%)                      |         |        | 40 (70%)                         | 17 (30%)                       |         |        |
|                                                                              | microsatellite | I             | 383 (79%)                       | 101 (21%)                     |         |        | 321 (66%)                        | 163 (34%)                      |         |        |
|                                                                              | microsatellite | II            | 175 (77%)                       | 52 (23%)                      |         |        | 146 (64%)                        | 81 (36%)                       |         |        |
|                                                                              | microsatellite | III           | 129 (80%)                       | 32 (20%)                      |         |        | 100 (62%)                        | 61 (38%)                       |         |        |
|                                                                              | microsatellite | IV            | 7 (78%)                         | 2 (22%)                       | 0,68    | Trend  | 7 (78%)                          | 2 (22%)                        | 0,32    | Trend  |
| <b>Current Stage</b>                                                         | microsatellite | 0             | 41 (75%)                        | 14 (26%)                      |         |        | 39 (71%)                         | 16 (29%)                       |         |        |
|                                                                              | microsatellite | I             | 329 (79%)                       | 87 (21%)                      |         |        | 274 (66%)                        | 142 (34%)                      |         |        |
|                                                                              | microsatellite | II            | 117 (77%)                       | 36 (24%)                      |         |        | 95 (62%)                         | 58 (38%)                       |         |        |
|                                                                              | microsatellite | III           | 163 (78%)                       | 46 (22%)                      |         |        | 135 (65%)                        | 74 (35%)                       |         |        |
|                                                                              | microsatellite | IV            | 101 (81%)                       | 24 (19%)                      | 0,68    | Trend  | 82 (66%)                         | 43 (34%)                       | 0,6     | Trend  |
| <b>Thickness</b>                                                             | microsatellite | in situ       | 42 (74%)                        | 15 (26%)                      |         |        | 40 (70%)                         | 17 (30%)                       |         |        |
|                                                                              | microsatellite | <1.01         | 244 (79%)                       | 64 (21%)                      |         |        | 203 (66%)                        | 105 (34%)                      |         |        |
|                                                                              | microsatellite | 1.01 - 2.00   | 206 (79%)                       | 56 (21%)                      |         |        | 171 (65%)                        | 91 (35%)                       |         |        |
|                                                                              | microsatellite | 2.01 - 4.00   | 116 (76%)                       | 36 (24%)                      |         |        | 102 (67%)                        | 50 (33%)                       |         |        |
|                                                                              | microsatellite | >4.00         | 93 (80%)                        | 24 (21%)                      | 0,88    | Trend  | 76 (65%)                         | 41 (35%)                       | 0,76    | Trend  |
| <b>Clark Level</b>                                                           | microsatellite | I = in situ   | 42 (74%)                        | 15 (26%)                      |         |        | 40 (70%)                         | 17 (30%)                       |         |        |
|                                                                              | microsatellite | II            | 83 (79%)                        | 22 (21%)                      |         |        | 70 (67%)                         | 35 (33%)                       |         |        |
|                                                                              | microsatellite | III           | 115 (79%)                       | 31 (21%)                      |         |        | 91 (62%)                         | 55 (38%)                       |         |        |
|                                                                              | microsatellite | IV            | 366 (79%)                       | 97 (21%)                      |         |        | 312 (67%)                        | 151 (33%)                      |         |        |
|                                                                              | microsatellite | V             | 47 (70%)                        | 20 (30%)                      | 0,92    | Trend  | 44 (66%)                         | 23 (34%)                       | 0,92    | Trend  |
| <b>Tumor Infiltrating Lymphocytes</b>                                        | microsatellite | absent        | 166 (85%)                       | 30 (15%)                      |         |        | 129 (66%)                        | 67 (34%)                       |         |        |
|                                                                              | microsatellite | non-brisk     | 300 (79%)                       | 82 (22%)                      |         |        | 251 (66%)                        | 131 (34%)                      |         |        |
|                                                                              | microsatellite | brisk         | 23 (77%)                        | 7 (23%)                       | 0,08    | Trend  | 21 (70%)                         | 9 (30%)                        | 0,8     | Trend  |
| <b>Number of Moles</b>                                                       | microsatellite | none          | 193 (79%)                       | 52 (21%)                      |         |        | 156 (64%)                        | 89 (36%)                       |         |        |
|                                                                              | microsatellite | few           | 379 (78%)                       | 107 (22%)                     |         |        | 318 (65%)                        | 168 (35%)                      |         |        |
|                                                                              | microsatellite | moderate      | 126 (78%)                       | 35 (22%)                      |         |        | 109 (68%)                        | 52 (32%)                       |         |        |
|                                                                              | microsatellite | many          | 30 (77%)                        | 9 (23%)                       | 0,8     | Trend  | 26 (67%)                         | 13 (33%)                       | 0,44    | Trend  |
| <b>Number of Freckles</b>                                                    | microsatellite | 1 = none      | 358 (78%)                       | 100 (22%)                     |         |        | 309 (68%)                        | 149 (33%)                      |         |        |
|                                                                              | microsatellite | 2             | 183 (79%)                       | 49 (21%)                      |         |        | 137 (59%)                        | 95 (41%)                       |         |        |
|                                                                              | microsatellite | 3             | 129 (77%)                       | 38 (23%)                      |         |        | 111 (67%)                        | 56 (34%)                       |         |        |
|                                                                              | microsatellite | 4             | 50 (78%)                        | 14 (22%)                      |         |        | 40 (63%)                         | 24 (38%)                       |         |        |
|                                                                              | microsatellite | 5             | 14 (82%)                        | 3 (18%)                       |         |        | 12 (71%)                         | 5 (29%)                        |         |        |
|                                                                              | microsatellite | 6 = many      | 6 (100%)                        | 0 (0%)                        | 0,68    | Trend  | 5 (83%)                          | 1 (17%)                        | 0,76    | Trend  |
| <b>Phenotypic Index</b>                                                      | microsatellite | 1 = low risk  | 19 (54%)                        | 16 (46%)                      |         |        | 31 (89%)                         | 4 (11%)                        |         |        |
|                                                                              | microsatellite | 2             | 158 (78%)                       | 46 (23%)                      |         |        | 139 (68%)                        | 65 (32%)                       |         |        |
|                                                                              | microsatellite | 3             | 237 (79%)                       | 65 (22%)                      |         |        | 190 (63%)                        | 112 (37%)                      |         |        |
|                                                                              | microsatellite | 4             | 260 (82%)                       | 56 (18%)                      |         |        | 197 (62%)                        | 119 (38%)                      |         |        |
|                                                                              | microsatellite | 5 = high risk | 79 (77%)                        | 24 (23%)                      | 0,04    | Trend  | 69 (67%)                         | 34 (33%)                       | 0,08    | Trend  |
| <b>Sex</b>                                                                   | microsatellite | F             | 327 (80%)                       | 82 (20%)                      |         |        | 260 (64%)                        | 149 (36%)                      |         |        |
|                                                                              | microsatellite | M             | 429 (77%)                       | 126 (23%)                     | 0,36    | Fisher | 370 (67%)                        | 185 (33%)                      | 0,32    | Fisher |
| <b>Family History</b>                                                        | microsatellite | N             | 630 (79%)                       | 171 (21%)                     |         |        | 523 (65%)                        | 278 (35%)                      |         |        |
|                                                                              | microsatellite | Y             | 119 (77%)                       | 36 (23%)                      | 0,6     | Fisher | 102 (66%)                        | 53 (34%)                       | 0,92    | Fisher |
| <b>Multiple Primary</b>                                                      | microsatellite | N             | 641 (78%)                       | 178 (22%)                     |         |        | 533 (65%)                        | 286 (35%)                      |         |        |
|                                                                              | microsatellite | Y             | 114 (79%)                       | 30 (21%)                      | 0,92    | Fisher | 96 (67%)                         | 48 (33%)                       | 0,76    | Fisher |

|                                | Polymorphism   | variable           | At least one [CA] <sub>14</sub> | Absence of [CA] <sub>14</sub> | p-value | Test       |  | At least one [CA] <sub>≥21</sub> | Absence of [CA] <sub>≥21</sub> | p-value | Test       |
|--------------------------------|----------------|--------------------|---------------------------------|-------------------------------|---------|------------|--|----------------------------------|--------------------------------|---------|------------|
| <b>Dysplastic Nevus</b>        | microsatellite | N                  | 414 (80%)                       | 106 (20%)                     |         |            |  | 336 (65%)                        | 184 (35%)                      |         |            |
|                                | microsatellite | Y                  | 159 (76%)                       | 51 (24%)                      | 0,28    | Fisher     |  | 142 (68%)                        | 68 (32%)                       | 0,48    | Fisher     |
| <b>Ulceration</b>              | microsatellite | absent             | 403 (78%)                       | 112 (22%)                     |         |            |  | 340 (66%)                        | 175 (34%)                      |         |            |
|                                | microsatellite | present            | 142 (78%)                       | 40 (22%)                      | 1       | Fisher     |  | 120 (66%)                        | 62 (34%)                       | 1       | Fisher     |
| <b>Regression</b>              | microsatellite | absent             | 298 (82%)                       | 64 (18%)                      |         |            |  | 228 (63%)                        | 134 (37%)                      |         |            |
|                                | microsatellite | present            | 190 (76%)                       | 59 (24%)                      | 0,08    | Fisher     |  | 171 (69%)                        | 78 (31%)                       | 0,16    | Fisher     |
| <b>Lymphovascular Invasion</b> | microsatellite | absent             | 436 (80%)                       | 111 (20%)                     |         |            |  | 362 (66%)                        | 185 (34%)                      |         |            |
|                                | microsatellite | present            | 50 (77%)                        | 15 (23%)                      | 0,64    | Fisher     |  | 43 (66%)                         | 22 (34%)                       | 1       | Fisher     |
| <b>Perineural Invasion</b>     | microsatellite | absent             | 318 (78%)                       | 89 (22%)                      |         |            |  | 267 (66%)                        | 140 (34%)                      |         |            |
|                                | microsatellite | present            | 49 (82%)                        | 11 (18%)                      | 0,6     | Fisher     |  | 39 (65%)                         | 21 (35%)                       | 1       | Fisher     |
| <b>Mitotic Index</b>           | microsatellite | absent             | 77 (79%)                        | 20 (21%)                      |         |            |  | 70 (72%)                         | 27 (28%)                       |         |            |
|                                | microsatellite | present            | 351 (80%)                       | 89 (20%)                      | 1       | Fisher     |  | 287 (65%)                        | 153 (35%)                      | 0,24    | Fisher     |
| <b>Satellites</b>              | microsatellite | absent             | 206 (84%)                       | 39 (16%)                      |         |            |  | 160 (65%)                        | 85 (35%)                       |         |            |
|                                | microsatellite | present            | 24 (80%)                        | 6 (20%)                       | 0,6     | Fisher     |  | 17 (57%)                         | 13 (43%)                       | 0,4     | Fisher     |
| <b>Solar Elastosis</b>         | microsatellite | absent             | 18 (95%)                        | 1 (5%)                        |         |            |  | 9 (47%)                          | 10 (53%)                       |         |            |
|                                | microsatellite | present            | 29 (76%)                        | 9 (24%)                       | 0,16    | Fisher     |  | 26 (68%)                         | 12 (32%)                       | 0,16    | Fisher     |
| <b>Distant Metastasis</b>      | microsatellite | N                  | 652 (78%)                       | 184 (22%)                     |         |            |  | 546 (65%)                        | 290 (35%)                      |         |            |
|                                | microsatellite | Y                  | 102 (81%)                       | 24 (19%)                      | 0,48    | Fisher     |  | 82 (65%)                         | 44 (35%)                       | 1       | Fisher     |
| <b>Intransit Metastasis</b>    | microsatellite | N                  | 710 (78%)                       | 196 (22%)                     |         |            |  | 598 (66%)                        | 308 (34%)                      |         |            |
|                                | microsatellite | Y                  | 20 (77%)                        | 6 (23%)                       | 0,8     | Fisher     |  | 12 (46%)                         | 14 (54%)                       | 0,04    | Fisher     |
| <b>Tan/Burn Index</b>          | microsatellite | tend to tan        | 57 (66%)                        | 30 (35%)                      |         |            |  | 68 (78%)                         | 19 (22%)                       |         |            |
|                                | microsatellite | tend to sunburn    | 699 (80%)                       | 178 (20%)                     | <0.01   | Fisher     |  | 562 (64%)                        | 315 (36%)                      | <0.01   | Fisher     |
| <b>Race</b>                    | microsatellite | White non-Hispanic | 733 (79%)                       | 194 (21%)                     |         |            |  | 601 (65%)                        | 326 (35%)                      |         |            |
|                                | microsatellite | Hispanic           | 7 (70%)                         | 3 (30%)                       |         |            |  | 8 (80%)                          | 2 (20%)                        |         |            |
|                                | microsatellite | Black non-Hispanic | 3 (33%)                         | 6 (67%)                       |         |            |  | 8 (89%)                          | 1 (11%)                        |         |            |
|                                | microsatellite | Asian/Indian       | 1 (33%)                         | 2 (67%)                       | <0.01   | Chi-Square |  | 3 (100%)                         | 0 (0%)                         | 0,2     | Chi-Square |
| <b>Site</b>                    | microsatellite | extremities        | 387 (75%)                       | 130 (25%)                     |         |            |  | 348 (67%)                        | 169 (33%)                      |         |            |
|                                | microsatellite | head & neck        | 51 (75%)                        | 17 (25%)                      |         |            |  | 44 (65%)                         | 24 (35%)                       |         |            |
|                                | microsatellite | non-cutaneous      | 9 (82%)                         | 2 (18%)                       |         |            |  | 6 (55%)                          | 5 (46%)                        |         |            |
|                                | microsatellite | trunk              | 274 (84%)                       | 52 (16%)                      | <0.01   | Chi-Square |  | 209 (64%)                        | 117 (36%)                      | 0,68    | Chi-Square |
| <b>Histology</b>               | microsatellite | desmoplastic       | 16 (73%)                        | 6 (27%)                       |         |            |  | 14 (64%)                         | 8 (36%)                        |         |            |
|                                | microsatellite | other              | 179 (76%)                       | 56 (24%)                      |         |            |  | 165 (70%)                        | 70 (30%)                       |         |            |
|                                | microsatellite | spitzoid           | 8 (80%)                         | 2 (20%)                       |         |            |  | 8 (80%)                          | 2 (20%)                        |         |            |
|                                | microsatellite | unknown            | 553 (79%)                       | 144 (21%)                     | 0,68    | Chi-Square |  | 443 (64%)                        | 254 (36%)                      | 0,2     | Chi-Square |
